# Supplementary material
Source: publisher figshare collection journal article supplement (https://tandf.figshare.com/ndownloader/files/15666953)
Supplement: Supplementary file 1 [file 15666953]

Supplementary material for Sigfridsson, Rydberg, and Strimfors, “Nano- and microcrystals of griseofulvin subcutaneously administered to rats resulted in improved bioavailability and sustained release”, *Drug Development and Industrial Pharmacy*, 2019.

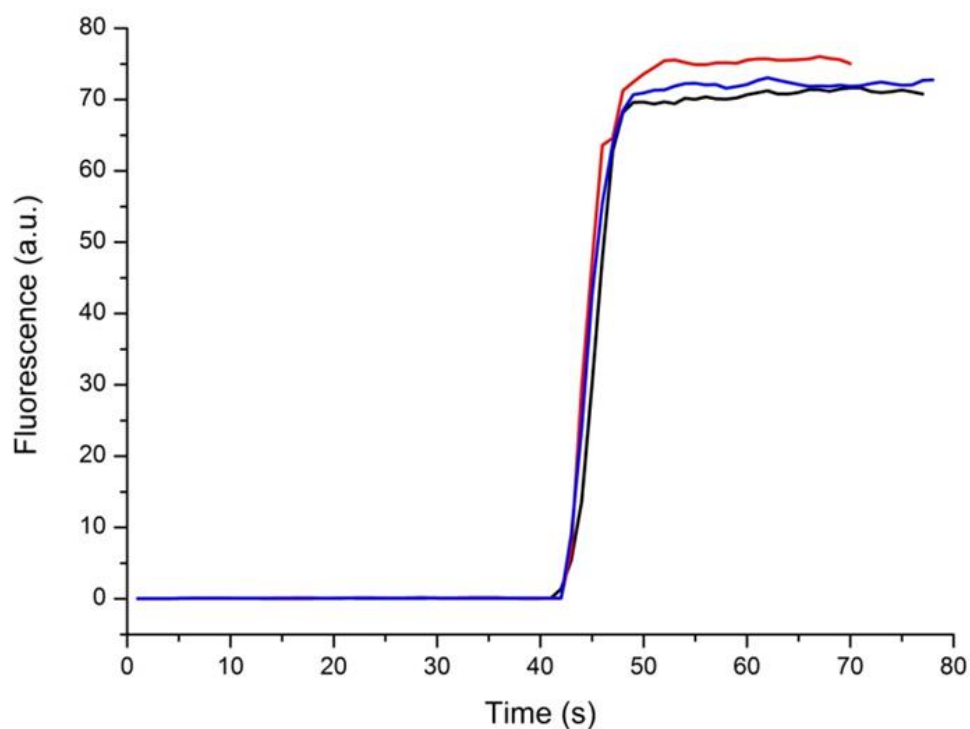

**Figure S1.** Experimental results for the fluorescence intensity of crystalline drug nanoparticles of griseofulvin vs time in dissolution experiments ( $n = 3$ ) performed in 10 mM HEPES at 37°C and pH 7. Maximum fluorescence is observed for dissolved particles.

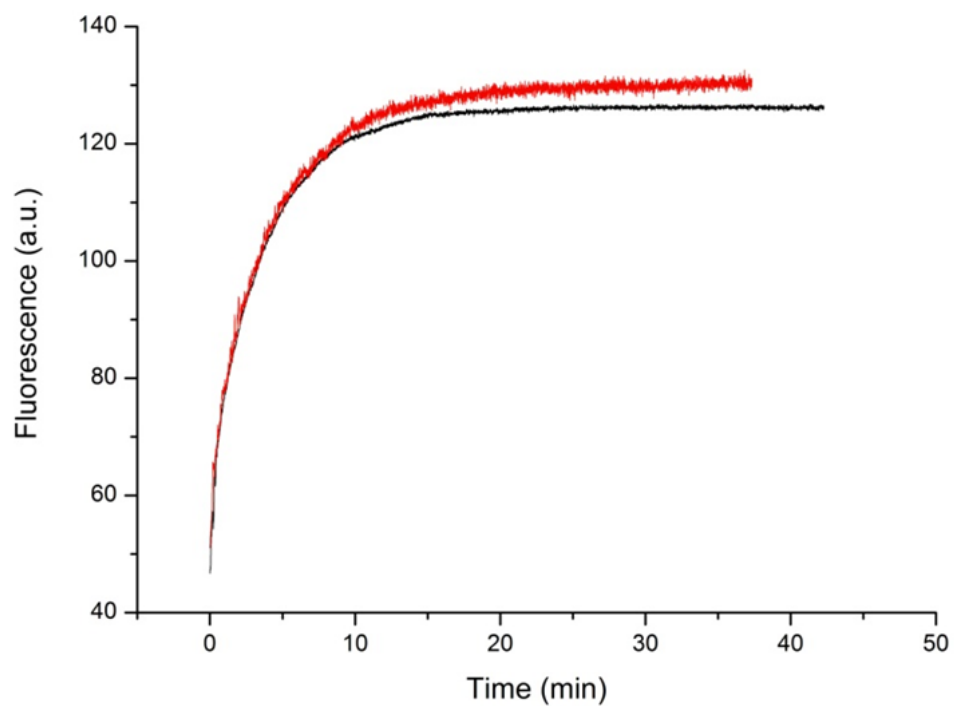

**Figure S2.** Experimental results for the fluorescence intensity of crystalline drug microparticles of griseofulvin *vs* time in dissolution experiments ( $n = 2$ ) performed in 10 mM HEPES at 37°C and pH 7. Maximum fluorescence is observed for dissolved particles.
